# Supplementary material
Source: HighWire-hosted journal article supplement (https://bmjopenquality.bmj.com/highwire/filestream/136109/field_highwire_adjunct_files/0/ds2222.docx)
Supplement: ds2222.docx [file ds2222.docx]

Table 1: LEAPPTM steps.

**L**isten: to the concerns of the patient and family; nurse and child life specialist’s assessment of the patient’s ability to tolerate the procedure

**E**valuate: patient’s current level of pain and anxiety; past medical procedures and/or traumatic events; likely response to the procedure

**A**nticipate: coordination of care needs; use of medication and non-pharmacological ways to reduce stress, pain and anxiety

**P**lan: preparation of the patient and family; identification of a singular voice speaking to the patient throughout the procedure; alternative steps in the event procedure fails or can no longer be tolerated

**P**roceed: when the treatment room is staffed and ready with supplies and equipment; when medications have reached their desired effect; position the patient immediately prior to the procedure; with a constant awareness of the patient’s changing needs

Table 2: Survey questions.

| Sufficient time to prepare for procedure. |
| --- |
| Evaluation of patient’s ability to tolerate procedure prior to the start of procedure. |
| Patient’s and family’s information and pain/distress management needs were met. |
| Explored non-pharmacological comfort and coping methods. |
| Patient received appropriate pain and anxiety medication prior to procedure. |
| Patient and family were well prepared for procedure. |
| Adequate support staff. |
| Necessary supplies, equipment and medication were in the room prior to start of procedure. |
| Assessed throughout the procedure how patient was tolerating procedure. |
| Patient’s pain and anxiety were well controlled during the procedure. |
